# Supplementary material for: A Rapid Spin Column-Based Method to Enrich Pathogen Transcripts from Eukaryotic Host Cells Prior to Sequencing
Source: PubMed Central journal article supplement (PMC5176299; doi:10.1371/journal.pone.0168788), 2016-12-21

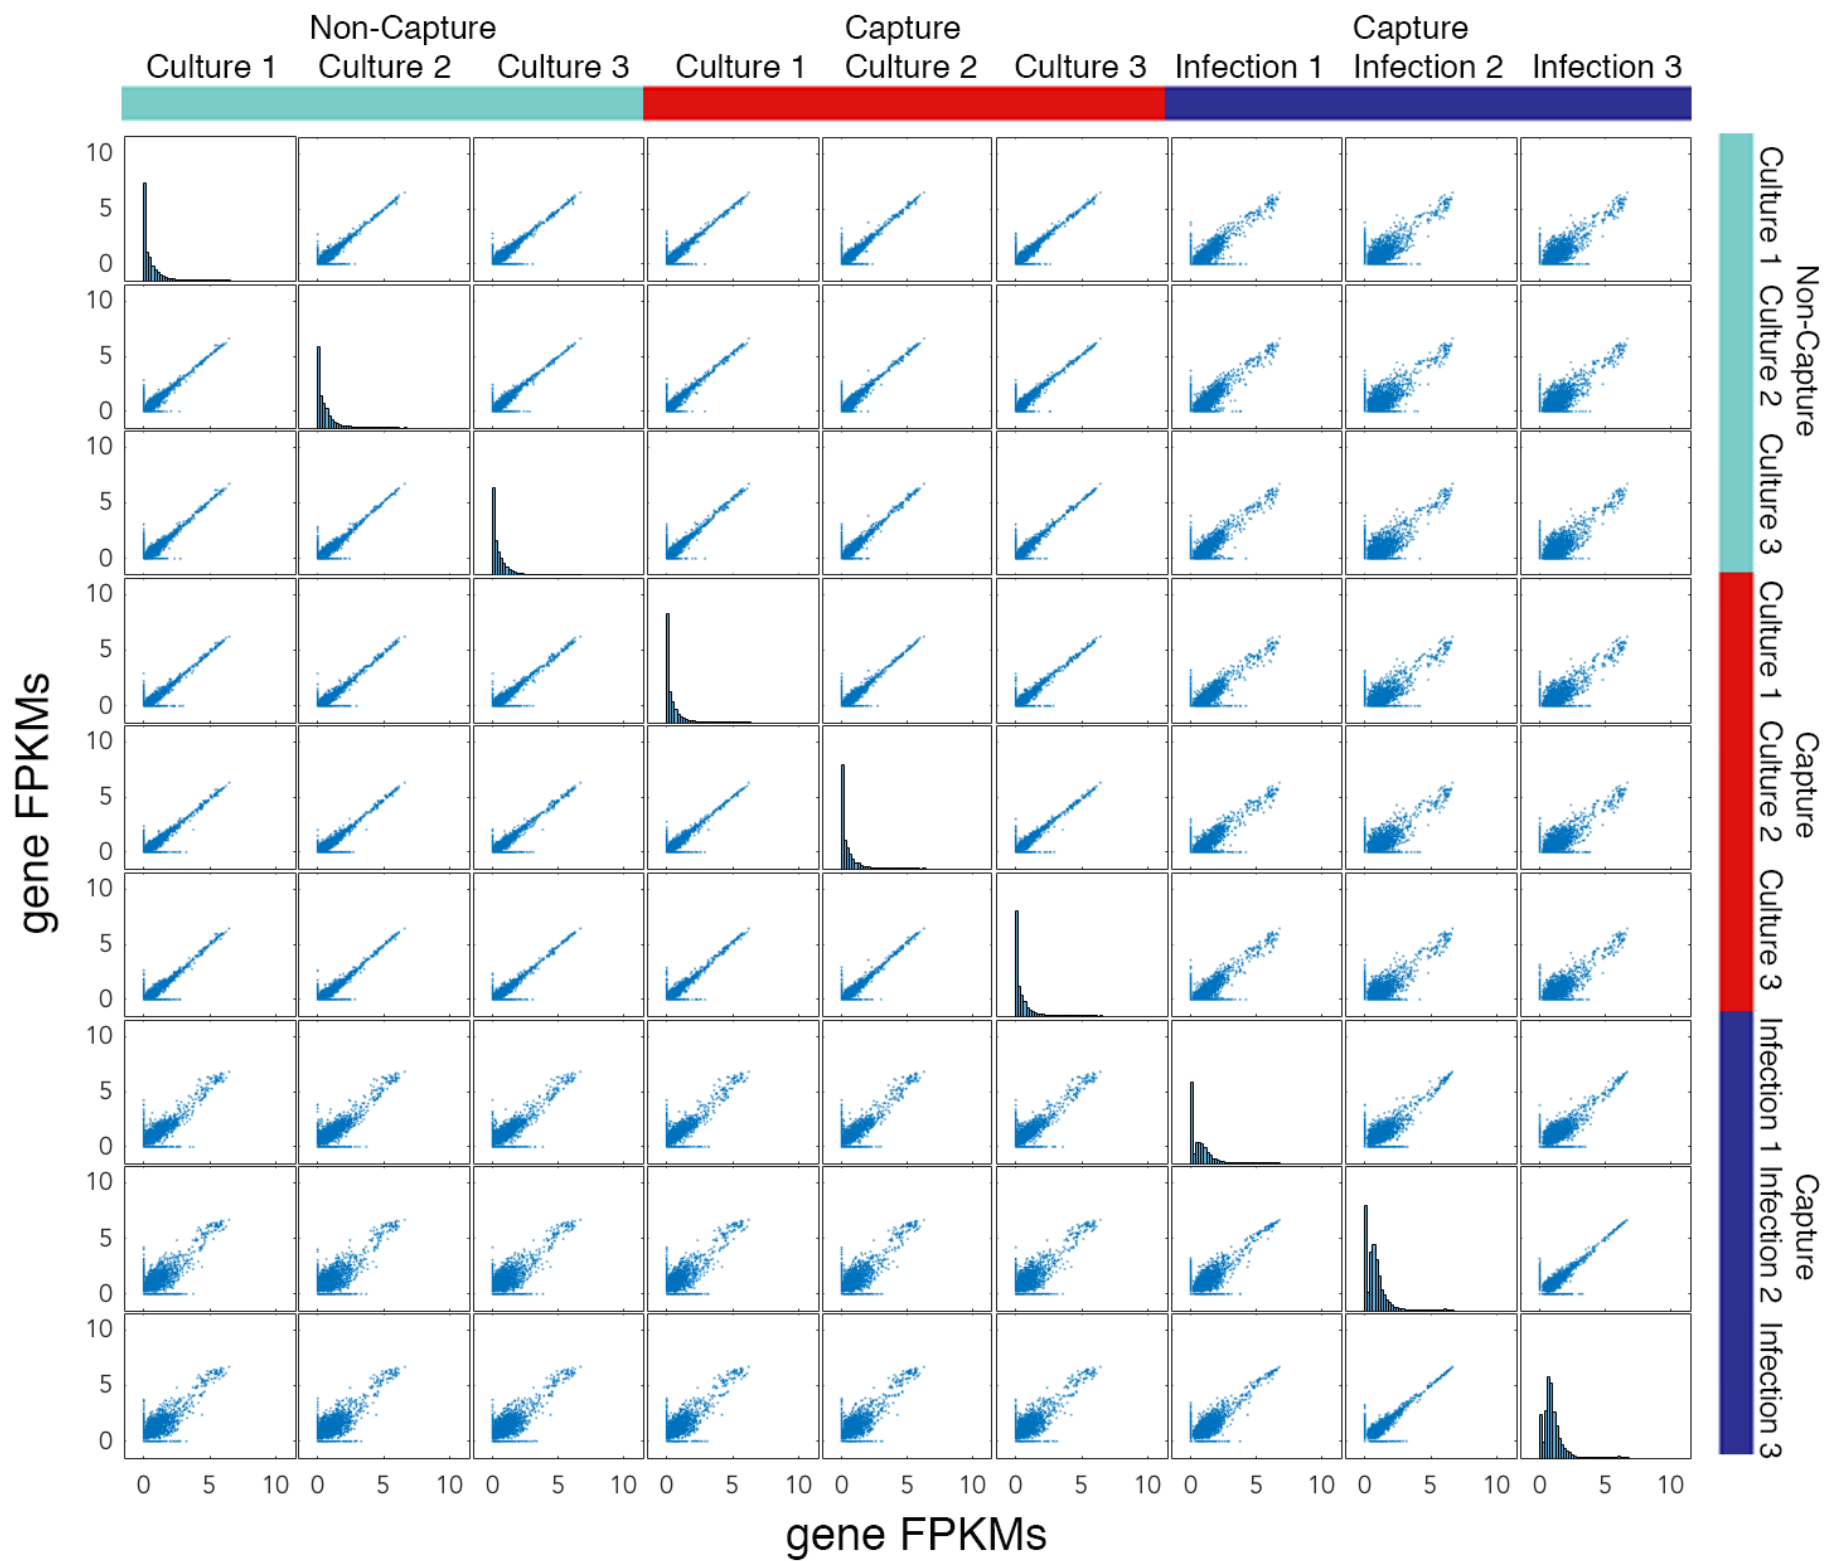

Supplement: pone.0168788.s003.pdf [file pone.0168788.s003.pdf]
